# Supplementary material for: Tropical upper tropospheric trends in ozone and carbon monoxide (2005–2020): observational and model results
Source: Copernicus journal article supplement (doi:10.5194/egusphere-2024-525), 2024-03-11
Supplement: Supplementary file 1 [file egusphere-2024-525-supplement.pdf]

1 **Supplement** (ACP submission by Lucien Froidevaux et al.)

2 **Tropical upper tropospheric trends in ozone and carbon monoxide (2005–2020): observational and model results**

3

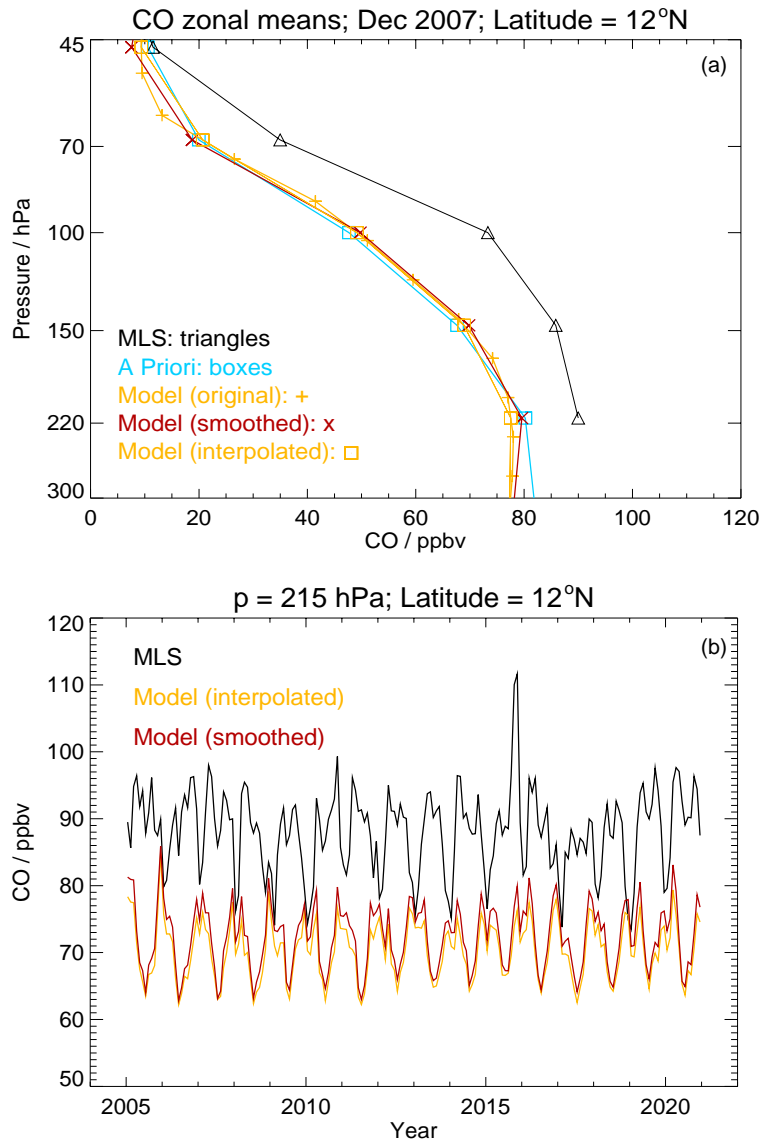

4

5

6 **Figure S1.** (a) Example of CO zonal mean profiles for December 2007 at 12°N, with MLS profile (black  
7 triangles), a priori tropical profile (cyan boxes), WACCM original profile on model grid (orange plus signs),  
8 smoothed model profile (red crosses) using the MLS tropical averaging kernels, and model profile using a  
9 simple interpolation (oranges boxes). (b) CO zonal mean series at 215 hPa for 12°N from MLS (black),  
10 WACCM series from simple interpolated profiles, (orange), and WACCM series from smoothed profiles  
11 using the MLS tropical averaging kernels and a priori profiles (see (a)).

12
